# Supplementary material for: Temperature-dependent mechanical properties of Tin+1CnO2 (n = 1, 2) MXene monolayers: a first-principles study
Source: Royal Society of Chemistry journal article supplement (doi:10.1039/c9cp06721c), 2020-01-01
Supplement: c9cp06721c1.pdf [file c9cp06721c1.pdf]

## Supporting Information

### Temperature-dependent mechanical properties of 2D $\text{Ti}_{n+1}\text{C}_n\text{O}_2$ ( $n = 1, 2$ ) MXene monolayers

Rasoul Khaledialidusti,<sup>\*1</sup> Babak Anasori,<sup>\*2</sup> Afroz Barnoush<sup>1</sup>

<sup>1</sup>Department of Mechanical and Industrial Engineering, Norwegian University of Science and Technology (NTNU), 7491 Trondheim, Norway.

<sup>2</sup>Department of Mechanical and Energy Engineering, and Integrated Nanosystems Development Institute, Purdue School of Engineering and Technology, Indiana University – Purdue University Indianapolis, Indianapolis, IN 46202, USA.

#### Dynamical stability

The phonon spectra of 2D  $\text{Ti}_{n+1}\text{C}_n\text{O}_2$  ( $n = 1, 2$ ) at state-free state and biaxial tensile and compressive strain of 1%, 3%, and 5% in the basal plane are shown in **Figs. S1** and **S2**, which passes several high symmetry directions ( $\Gamma_{(0,0,0)} \rightarrow M_{(1/2,0,0)} \rightarrow K_{(1/3,1/3,0)} \rightarrow \Gamma_{(0,0,0)}$ ).

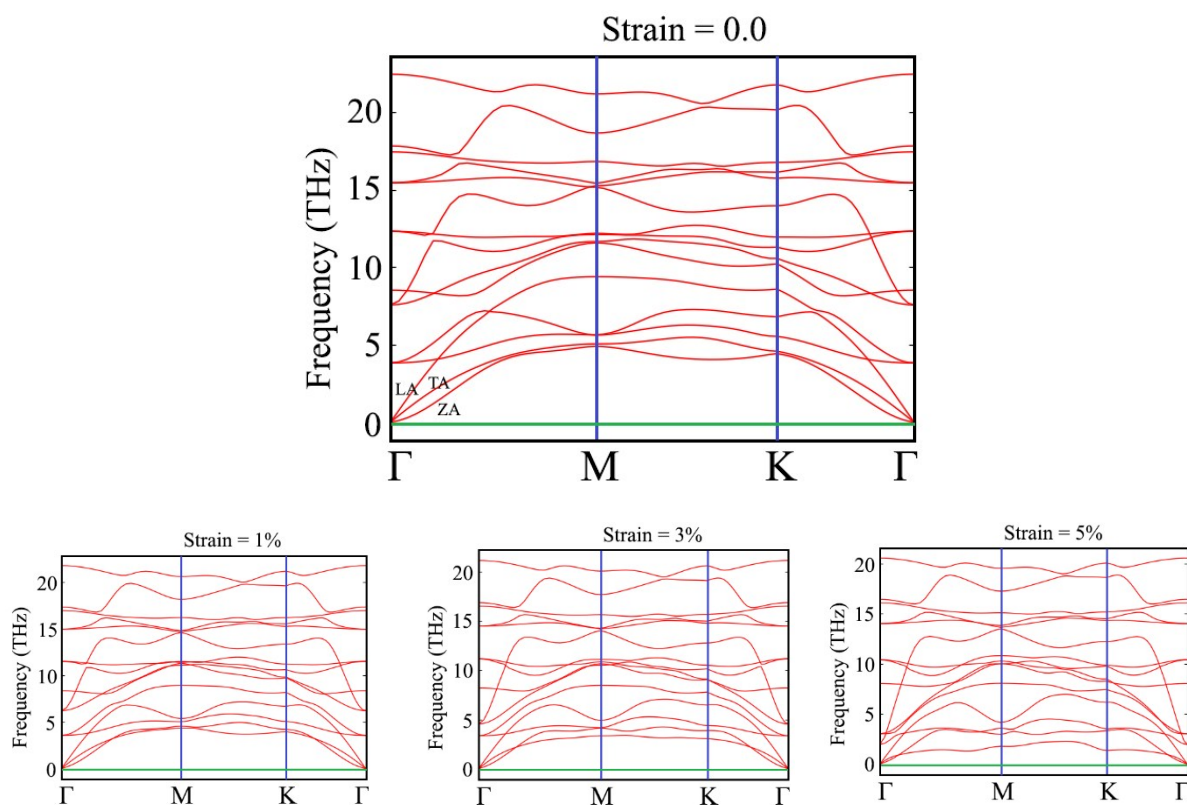

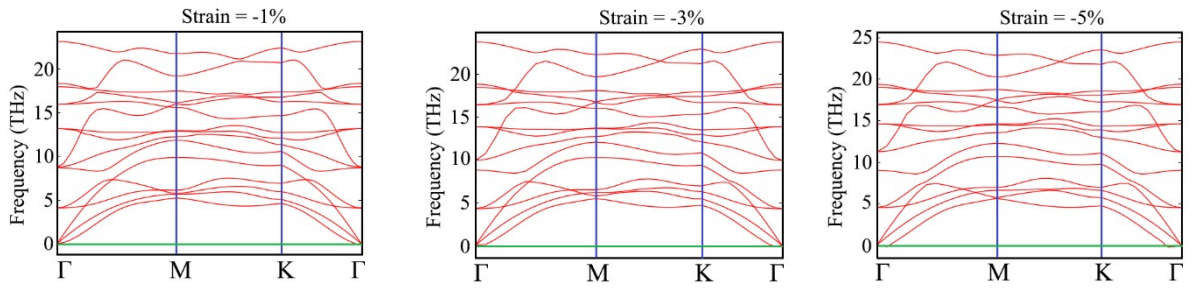

**Figure S1.** Phonon dispersion curves for  $\text{Ti}_2\text{CO}_2$  at state-free state and biaxial tensile and compressive strain of 1%, 3%, and 5% in the basal plane.

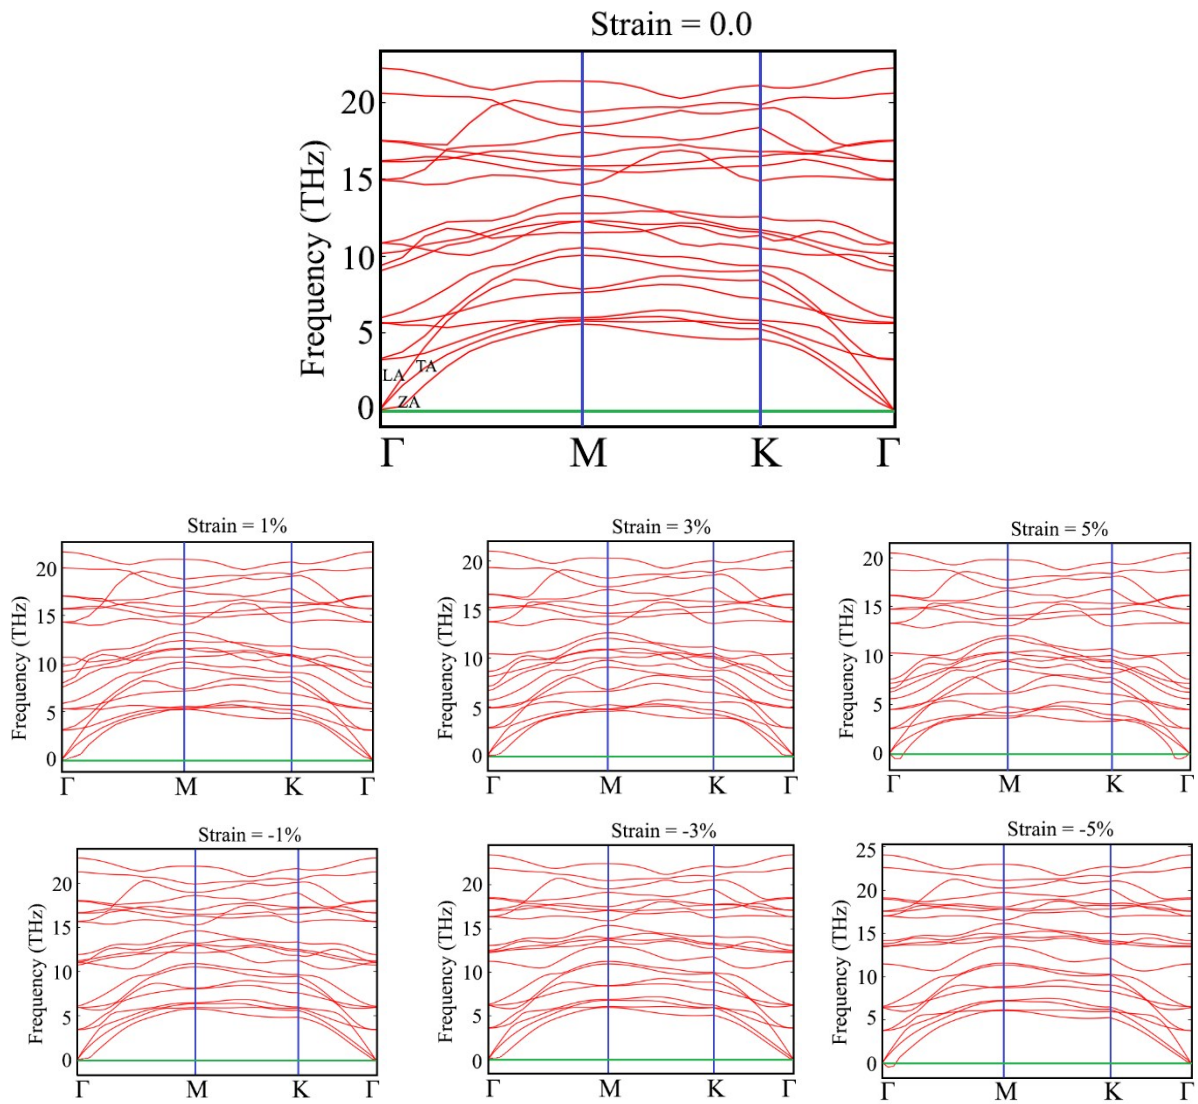

**Figure S2.** Phonon dispersion curves for  $\text{Ti}_3\text{C}_2\text{O}_2$  at the state-free state and biaxial tensile and compressive strain of 1%, 3%, and 5% in the basal plane.

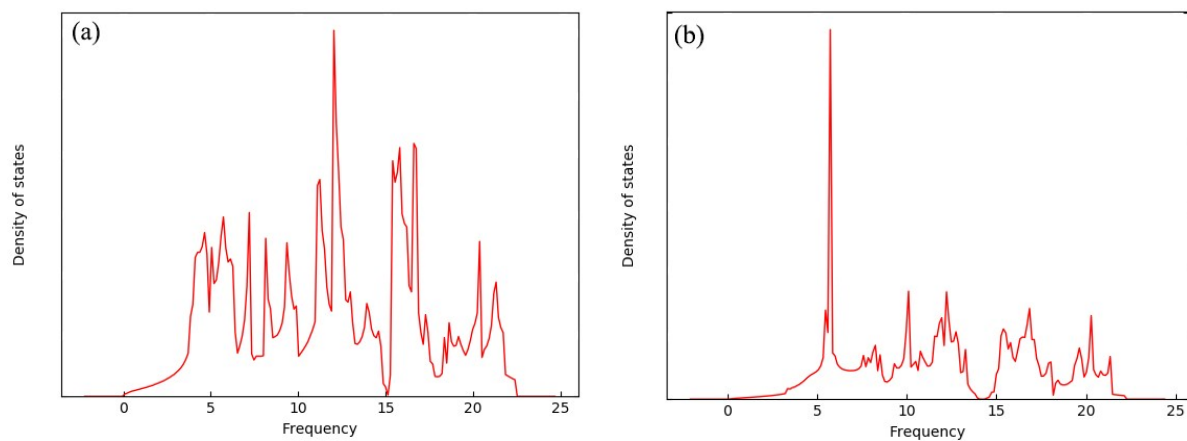

**Figure S3.** Calculated phonon DOS of (a) Ti<sub>2</sub>CO<sub>2</sub> and (b) Ti<sub>3</sub>C<sub>2</sub>O<sub>2</sub> monolayers at the state-free state.
